# Supplementary material for: The formyl peptide receptor agonist FPRa14 induces differentiation of Neuro2a mouse neuroblastoma cells into multiple distinct morphologies which can be specifically inhibited with FPR antagonists and FPR knockdown using siRNA
Source: PubMed Central journal article supplement (PMC6553754; doi:10.1371/journal.pone.0217815), 2019-06-06

## Exemplar Images used for analysis

### Neuro2a Control

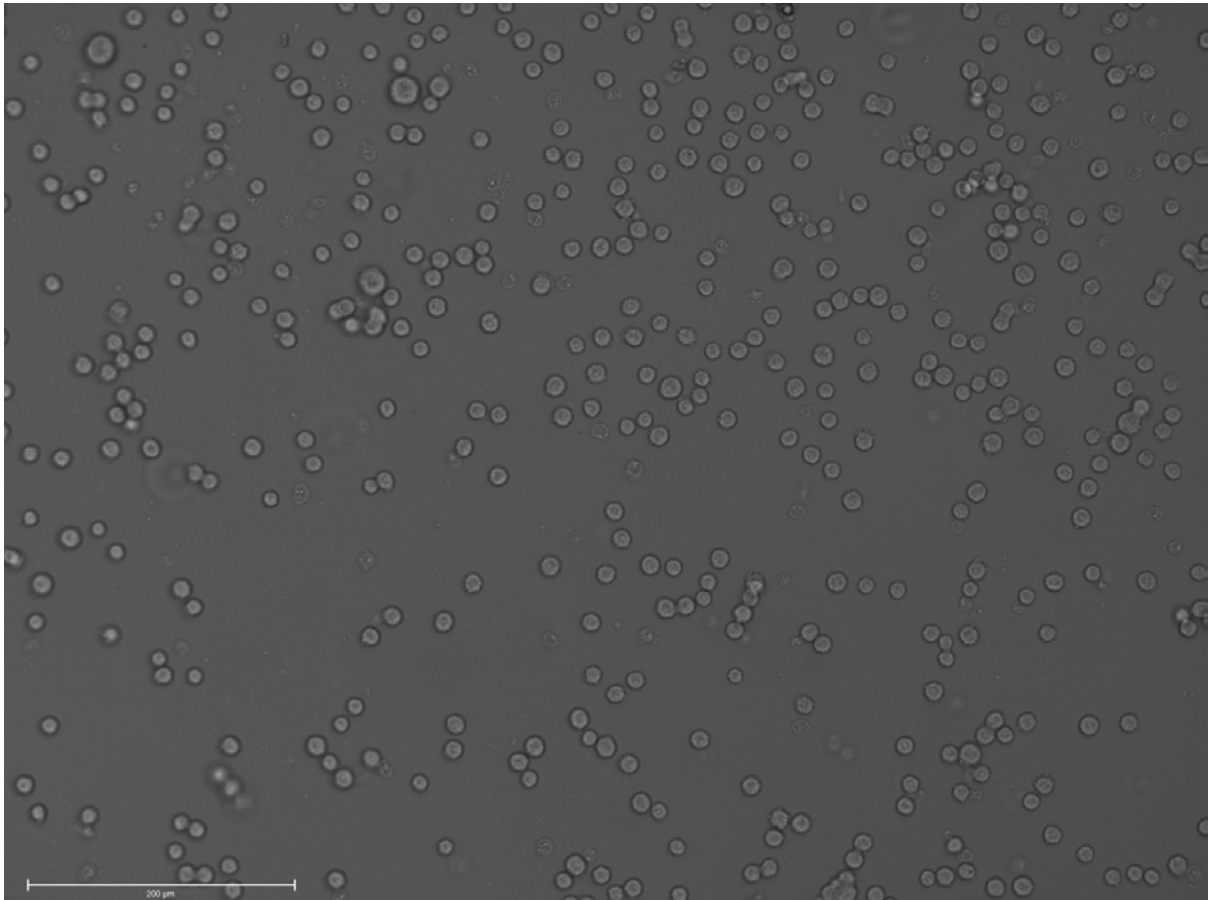

Neuro2a Control

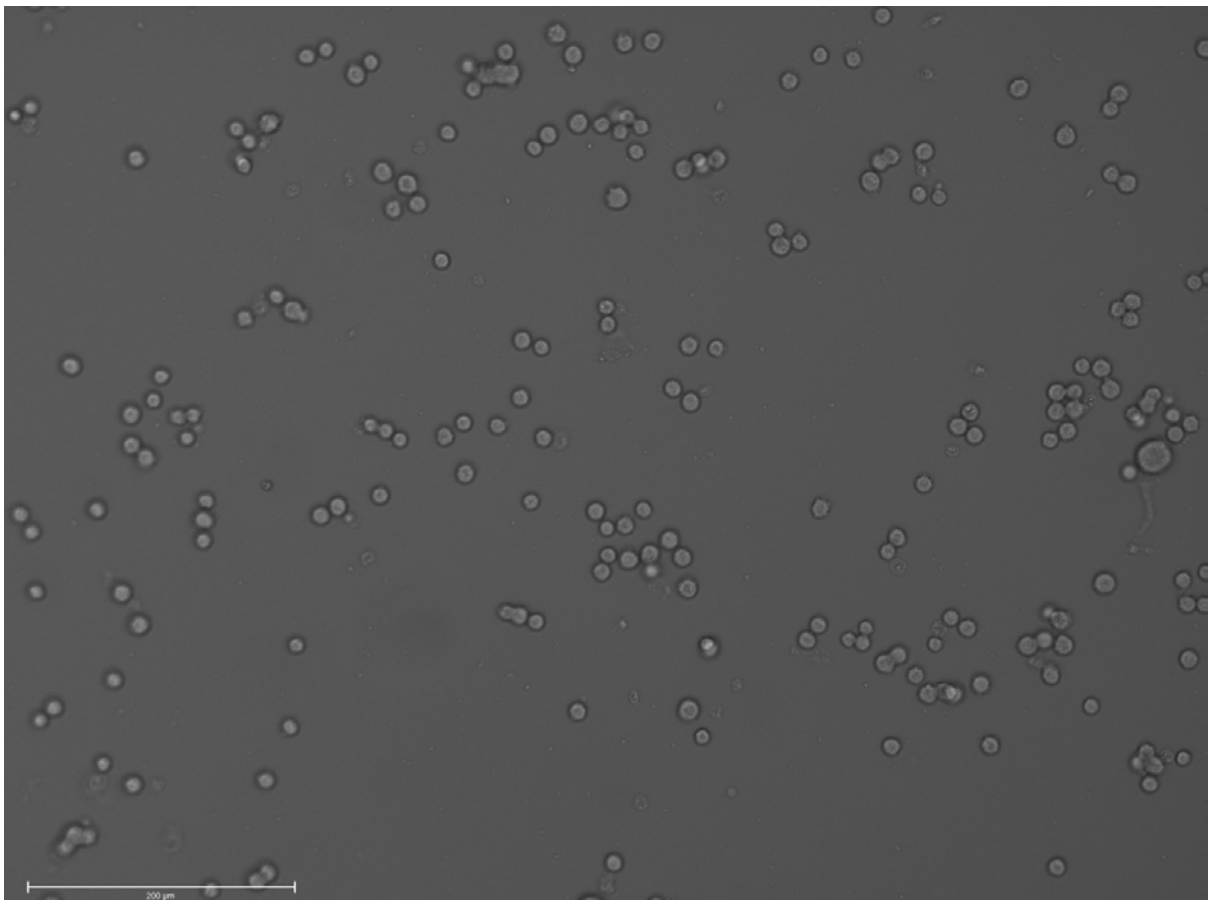

Neuro2a + 10 $\mu$ M FPRa14

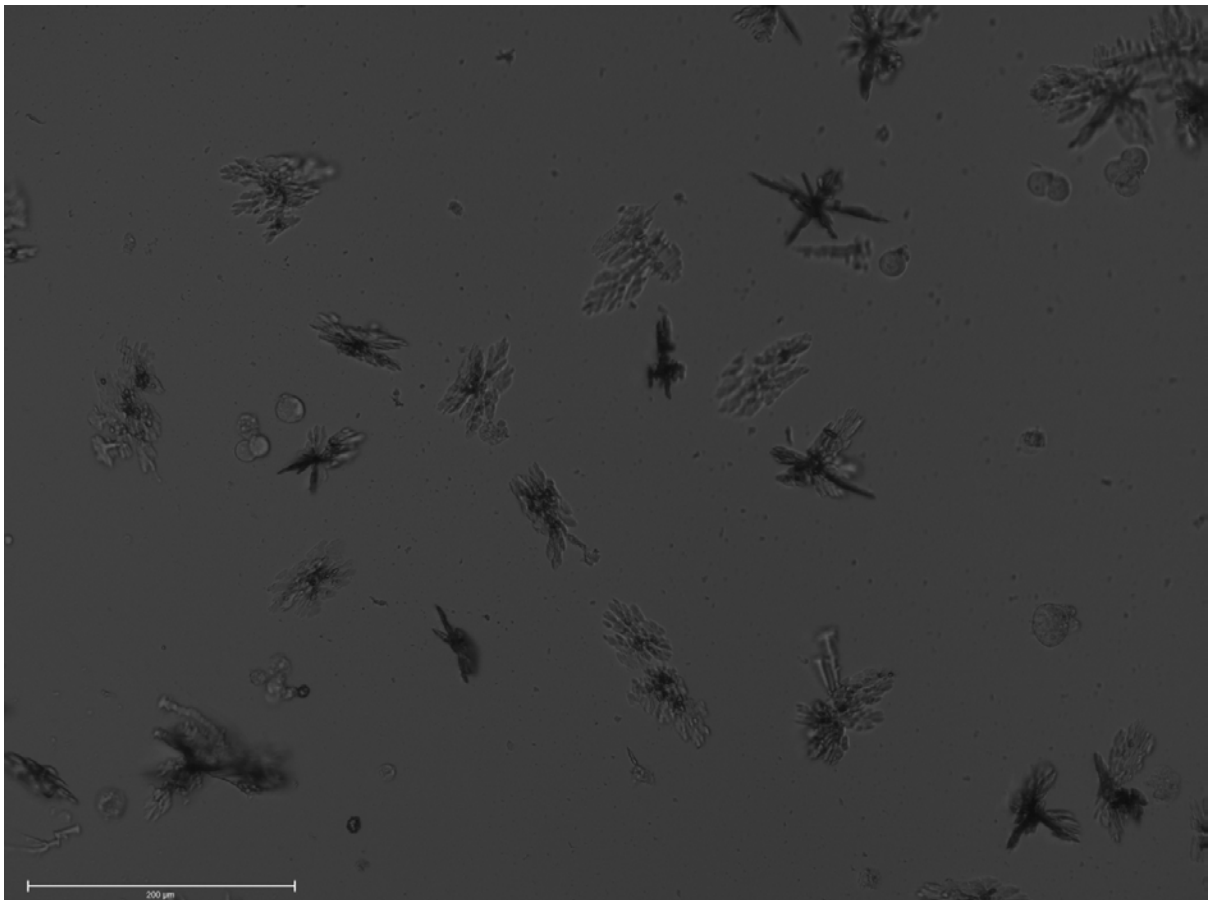

Neuro2a + 10 $\mu$ M FPRa14

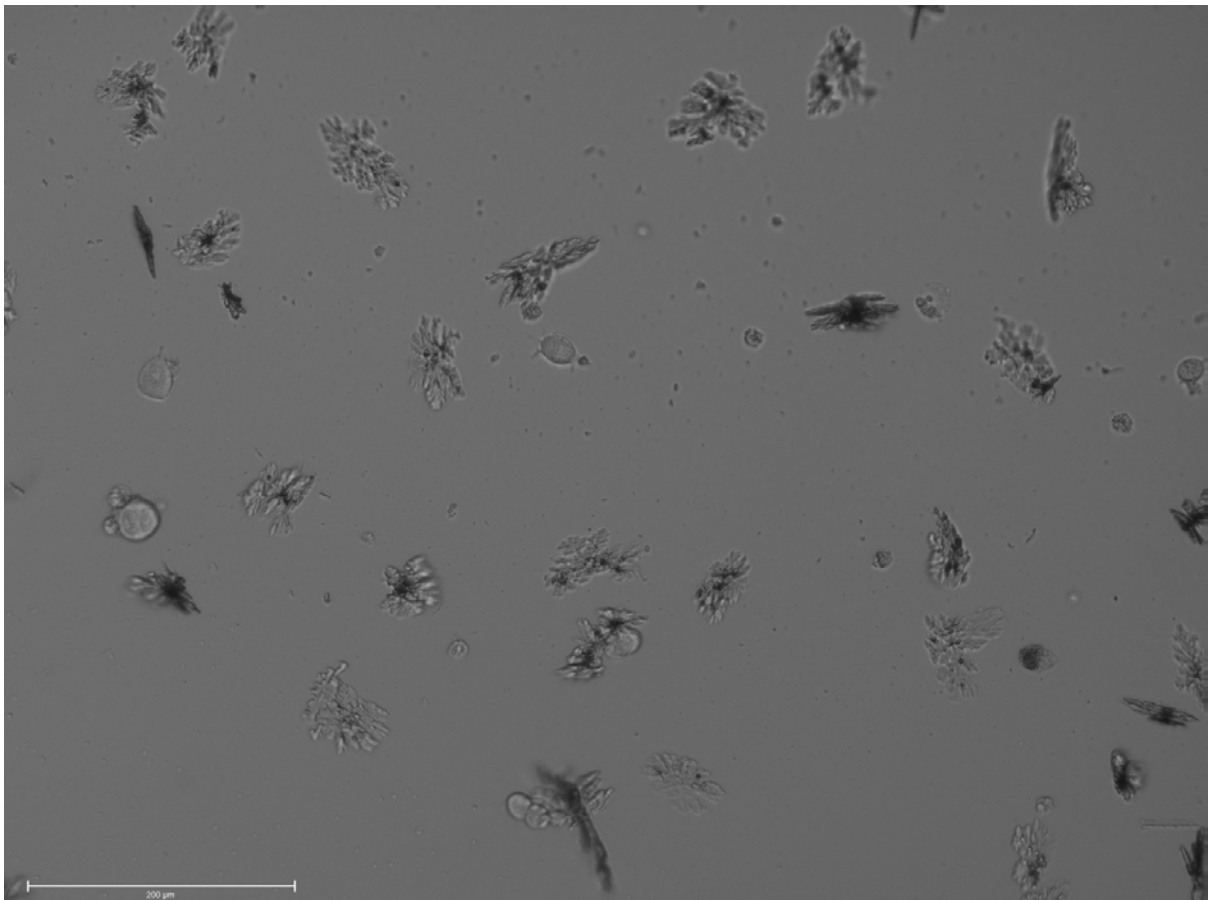

Neuro2a + 10 $\mu$ M FPRa14

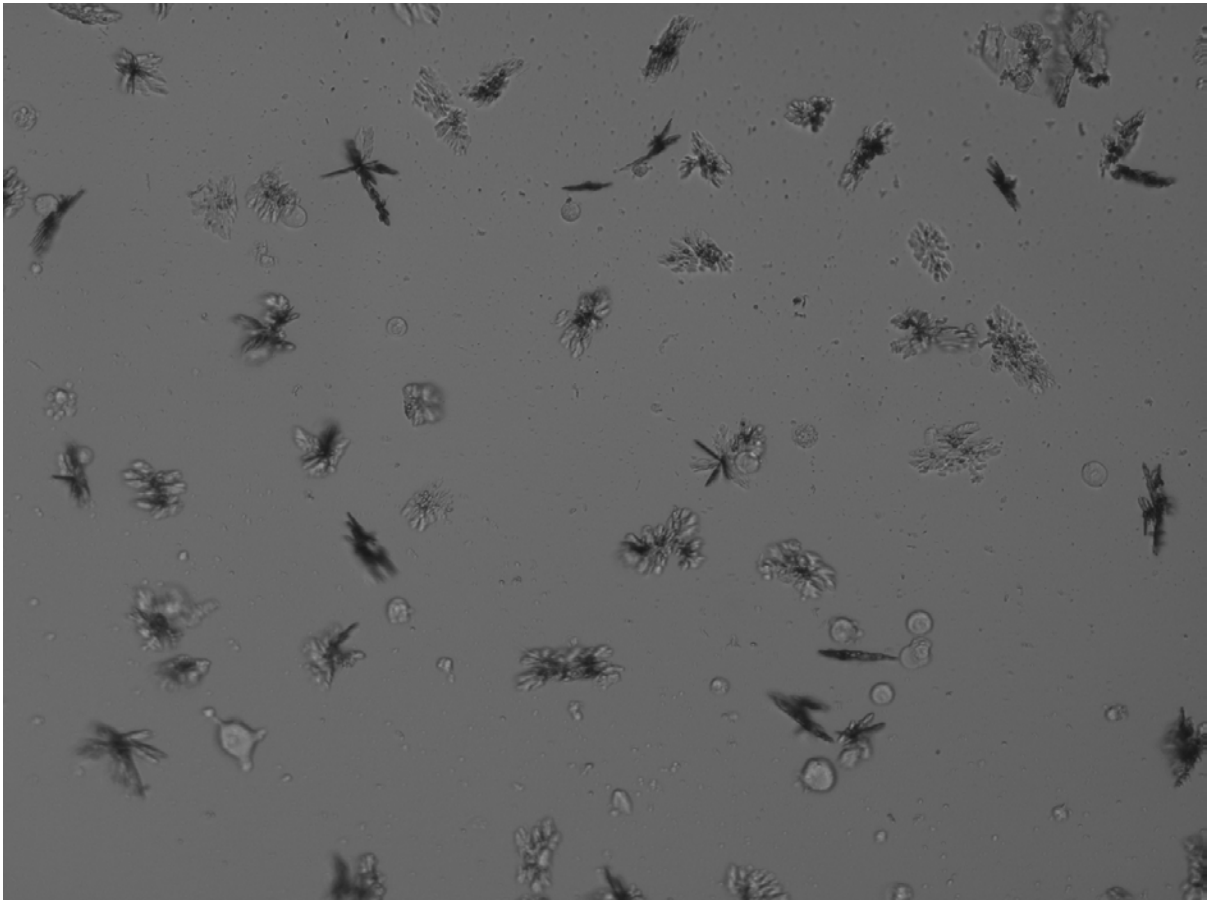

Neuro2a Type A

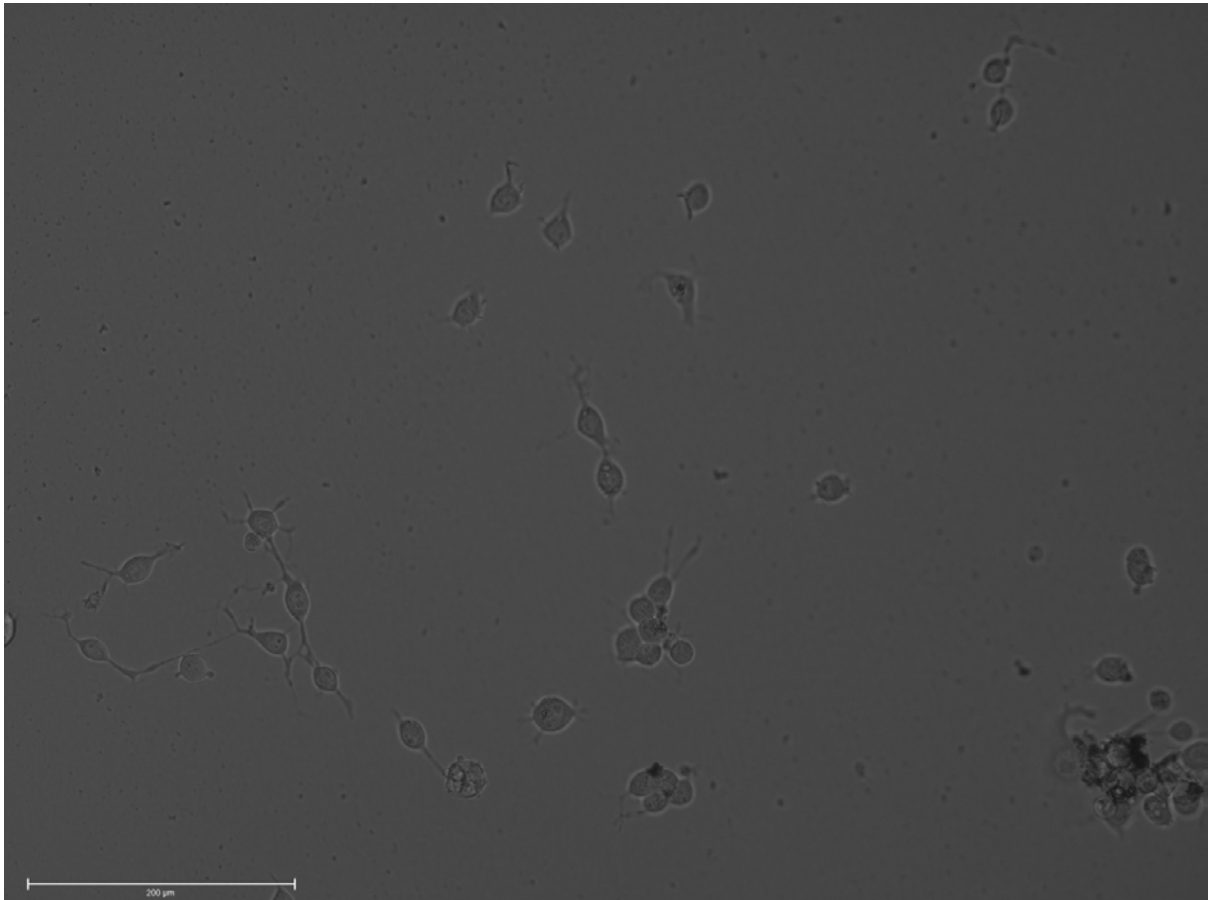

Neuro2a Type A

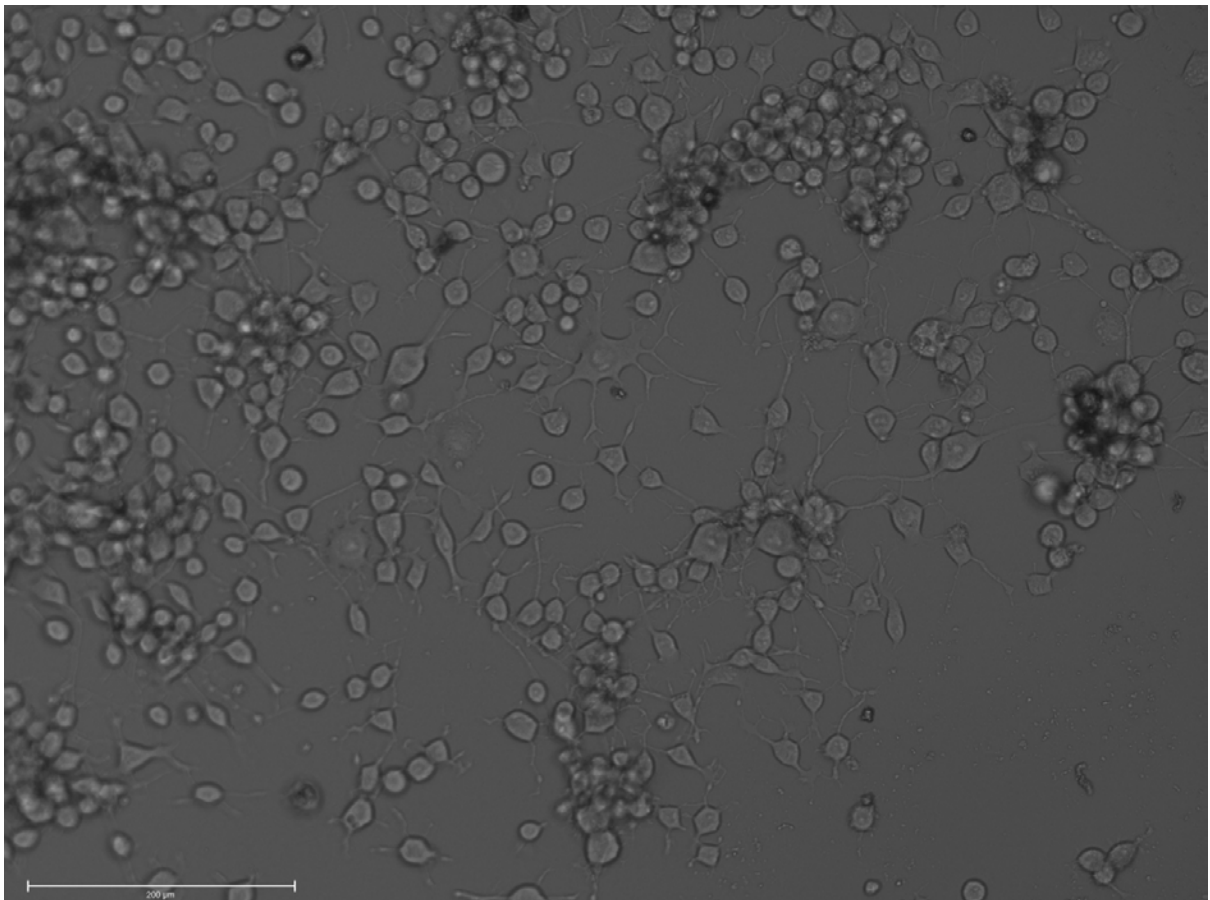

Neuro2a Type B

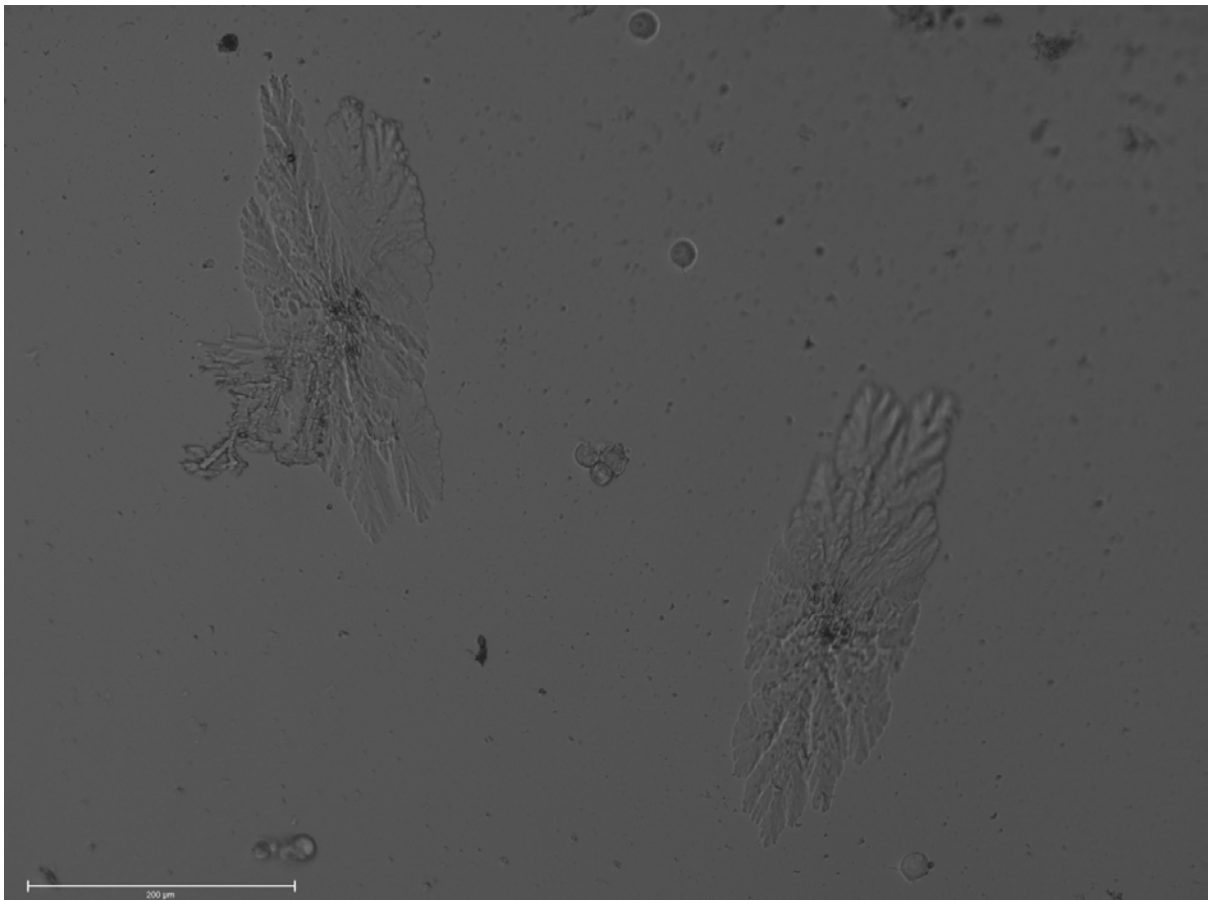



Neuro2a Type B

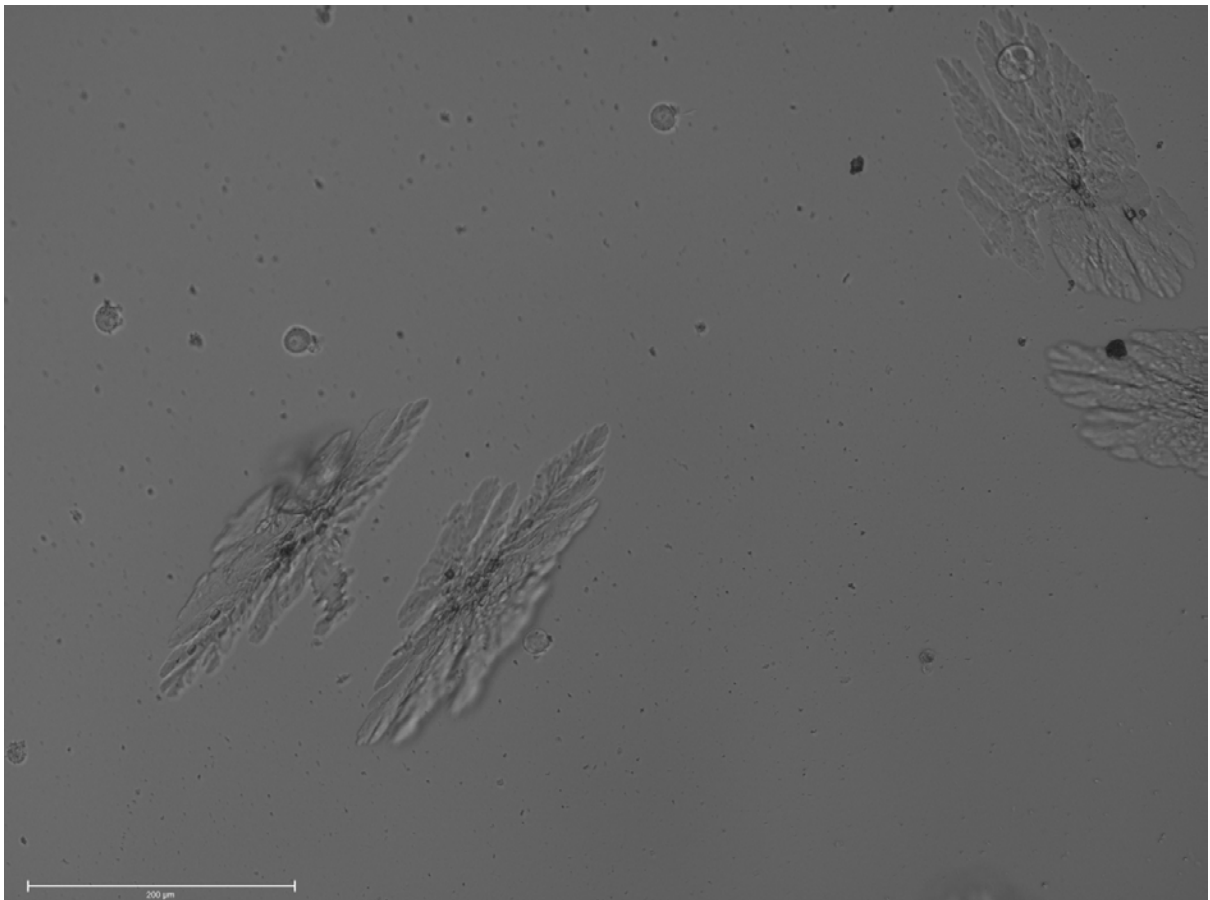

Neuro2a Type C

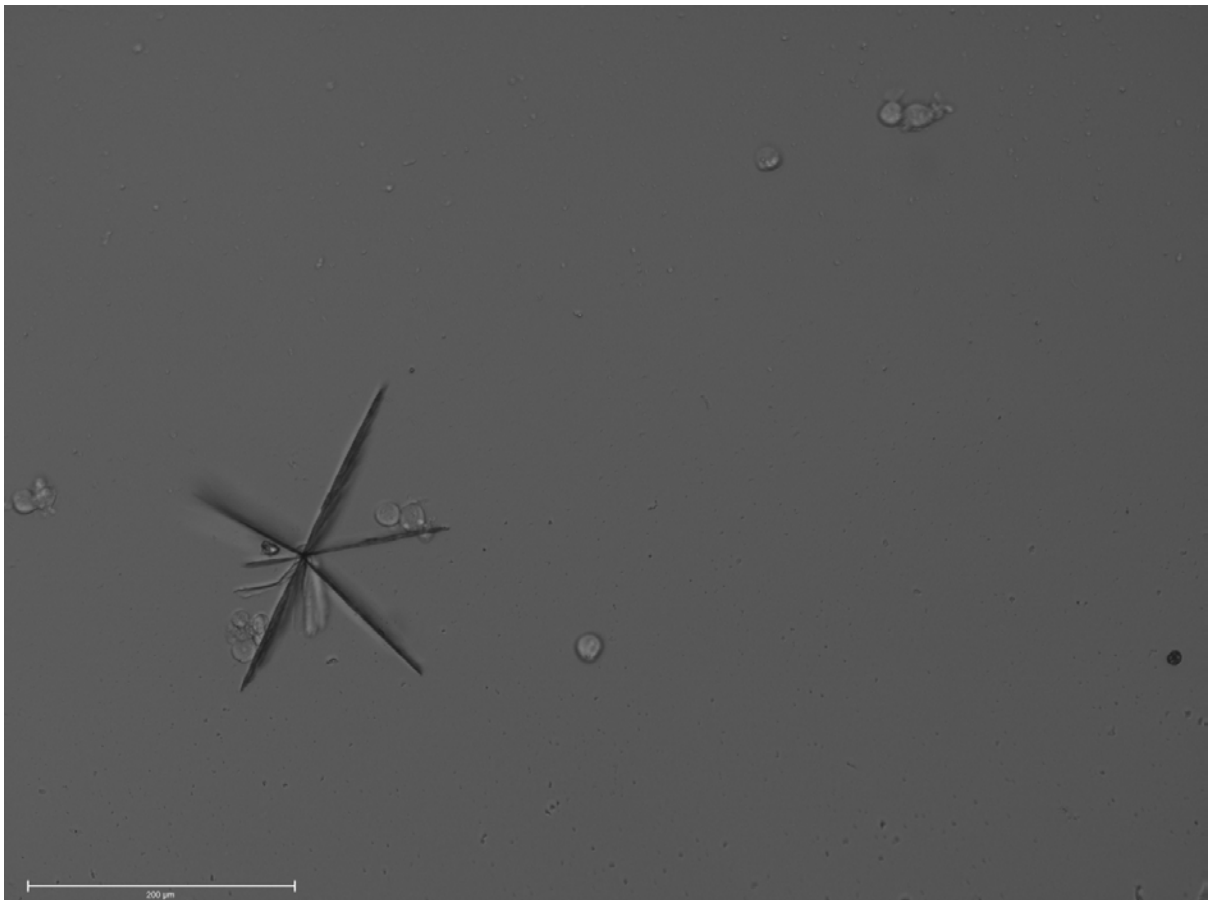

Neuro2a Type C

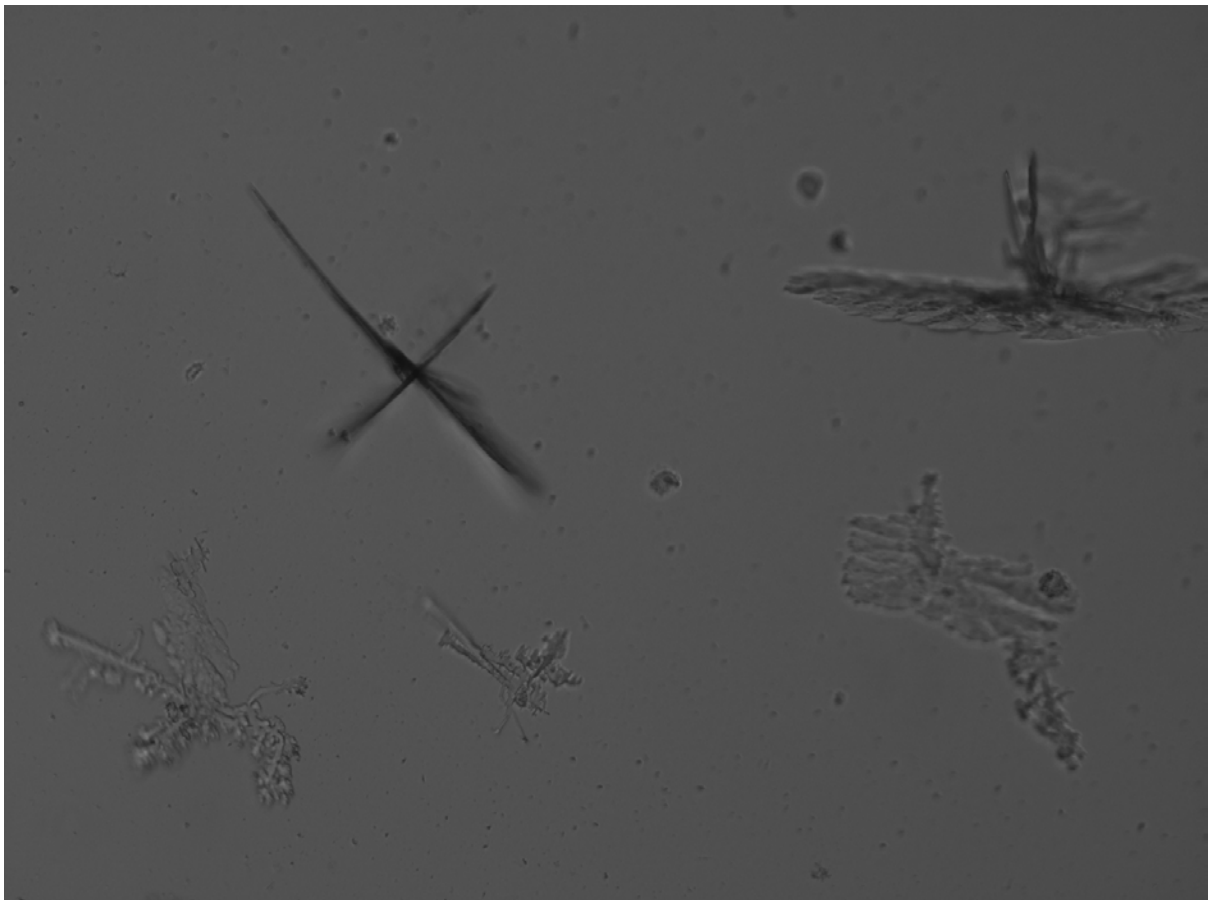

Neuro2a Type C

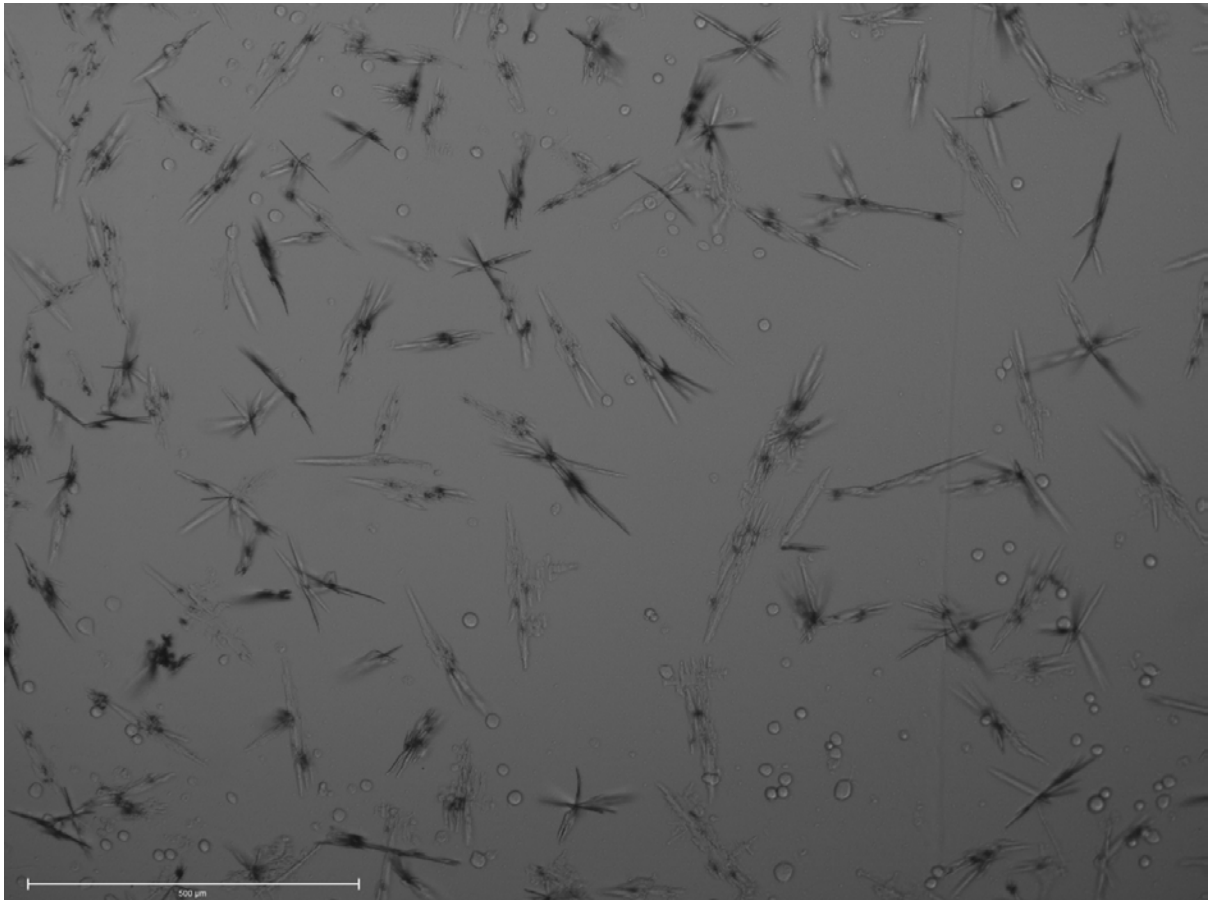

IMR-32 Control

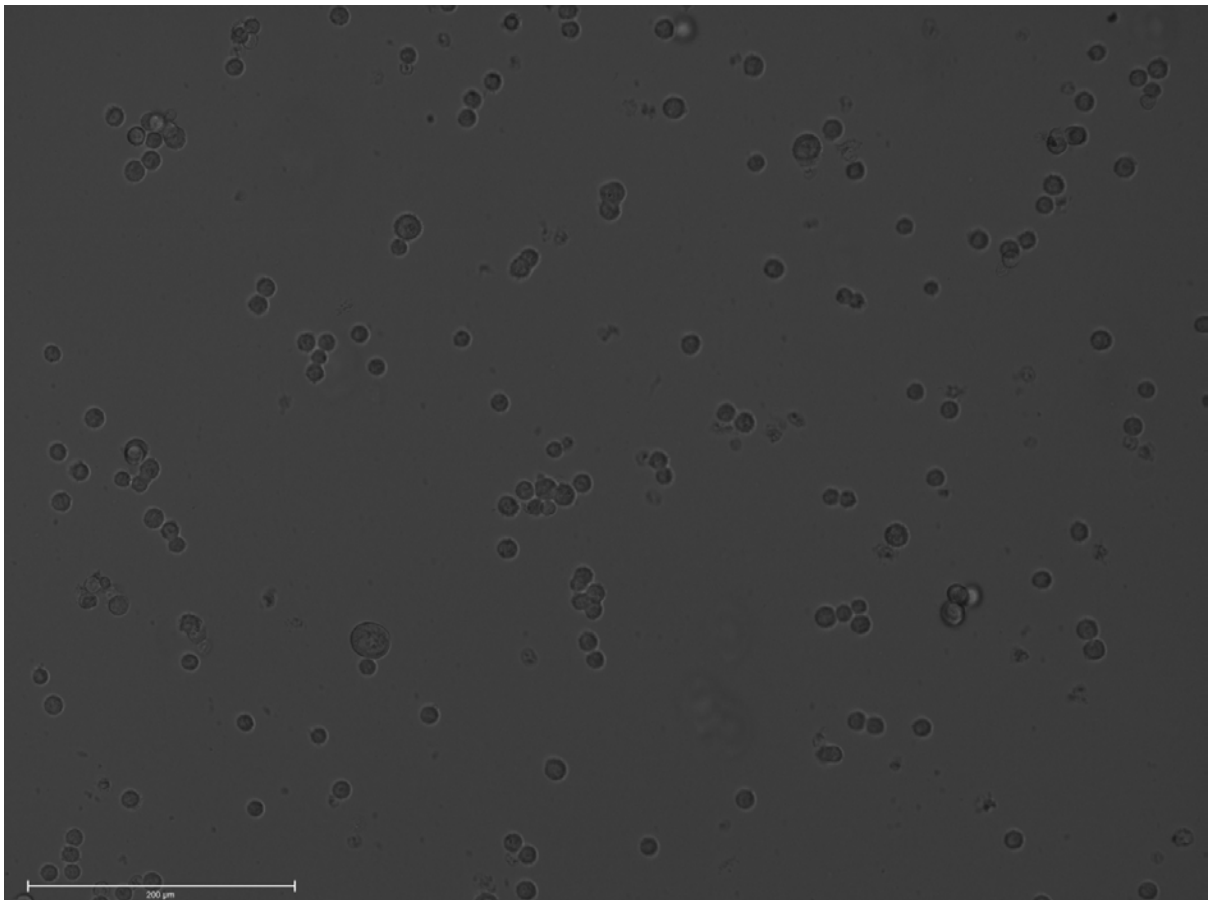

IMR-32 Control

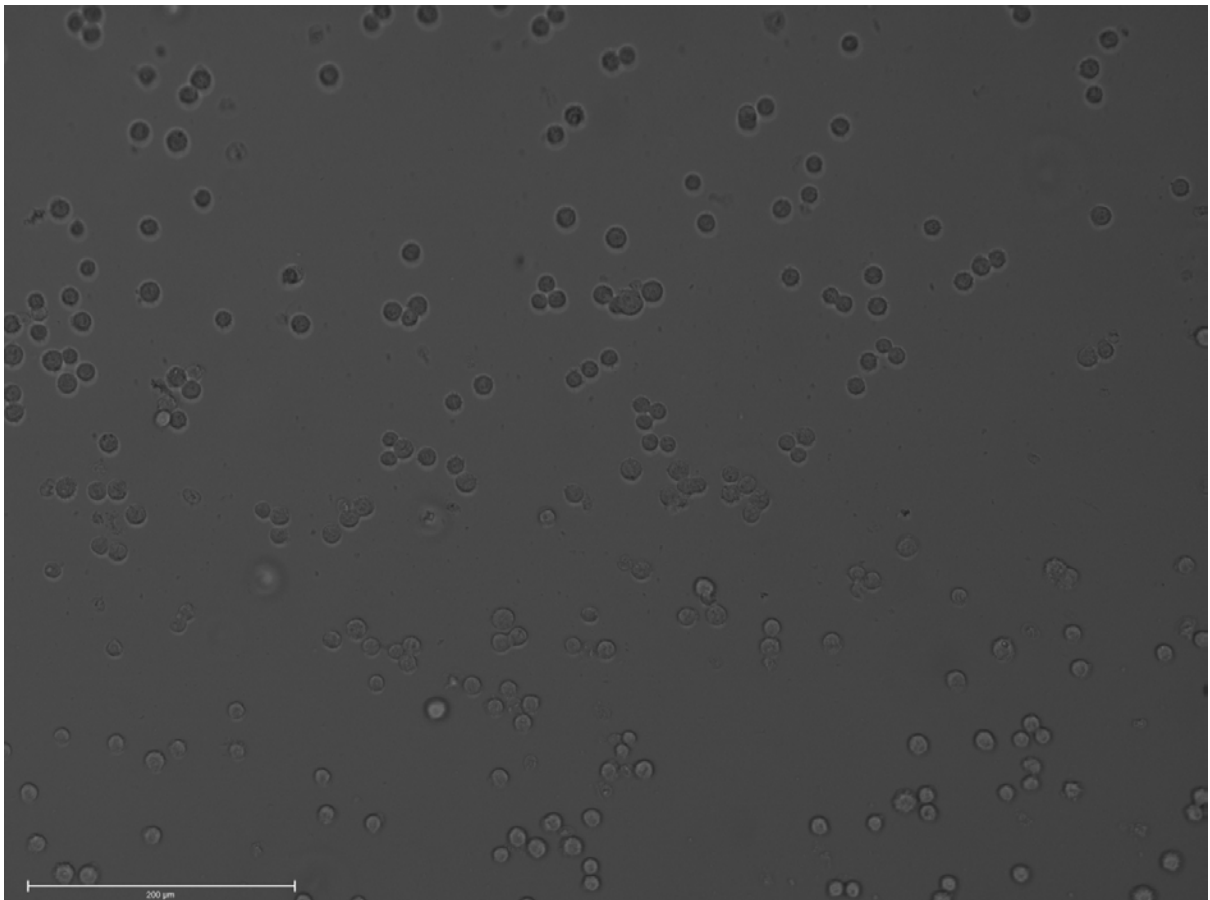

IMR-32 + 100 $\mu$ M FPRa14

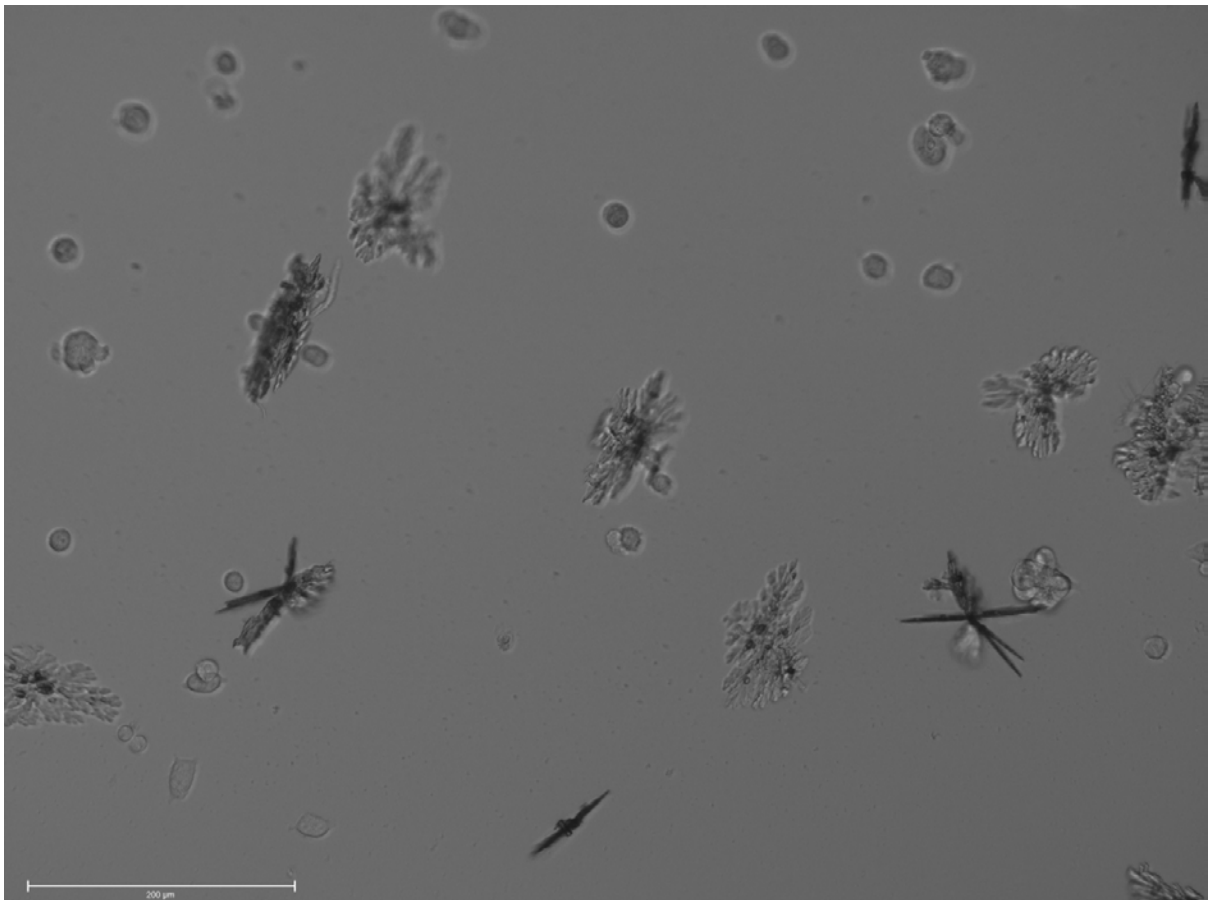

IMR-32 + 100 $\mu$ M FPRa14

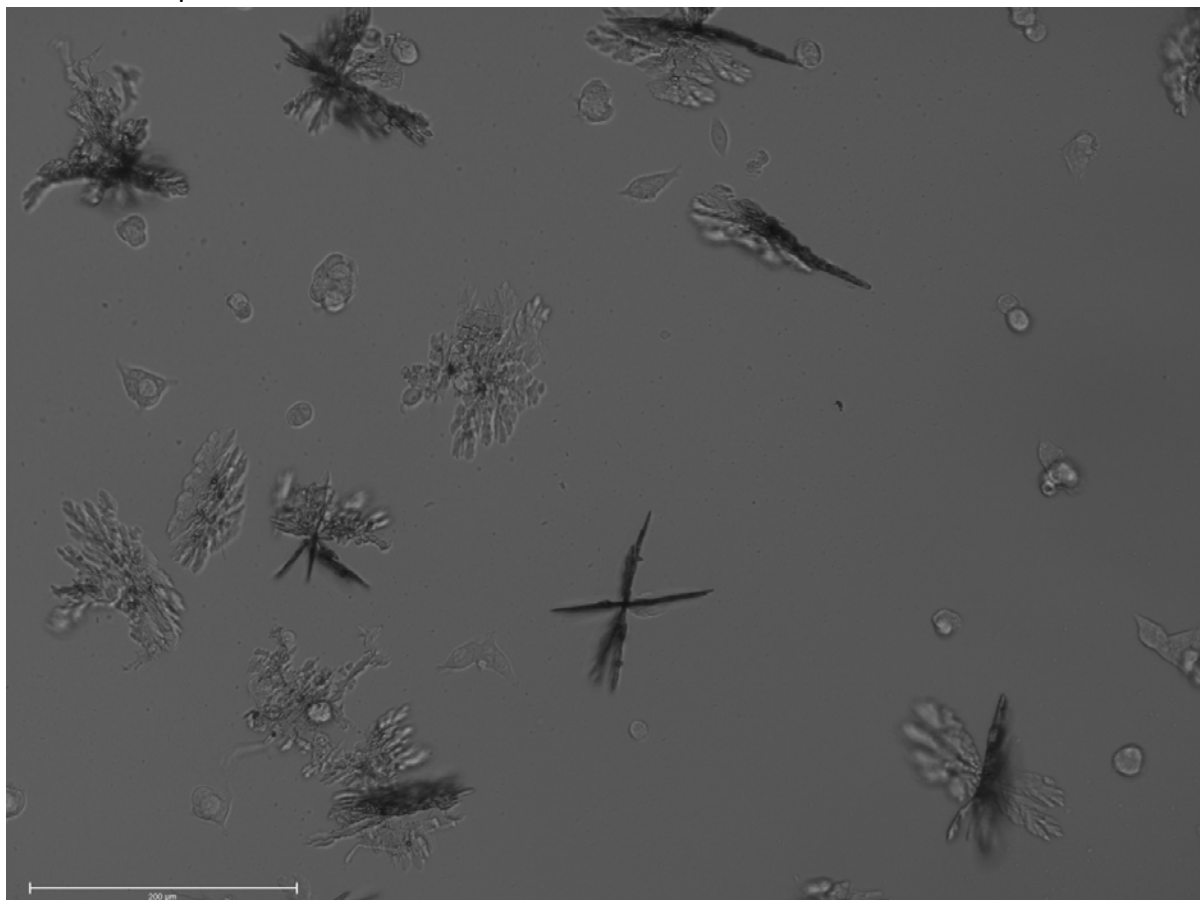



IMR-32 + 100 $\mu$ M FPRa14

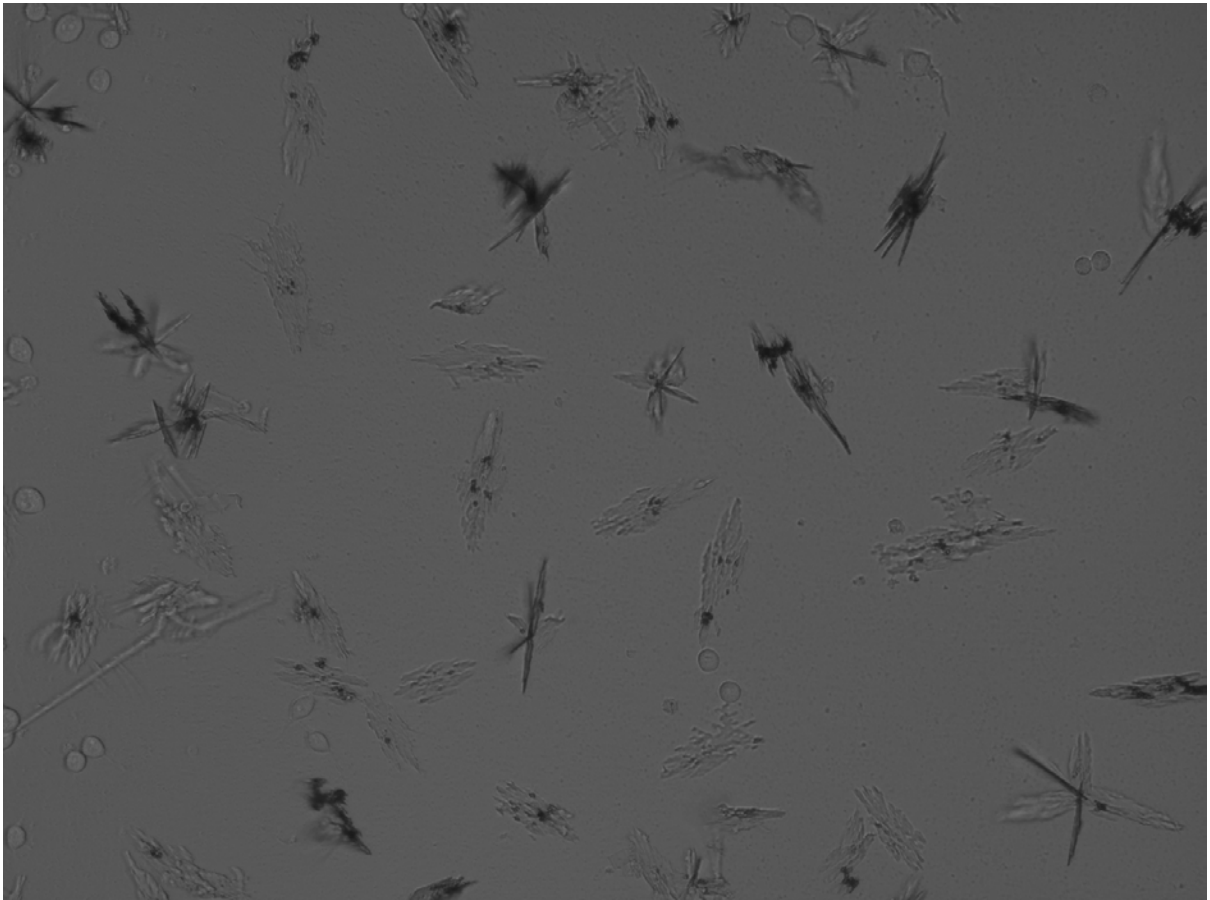

IMR-32 + 100 $\mu$ M FPRa14

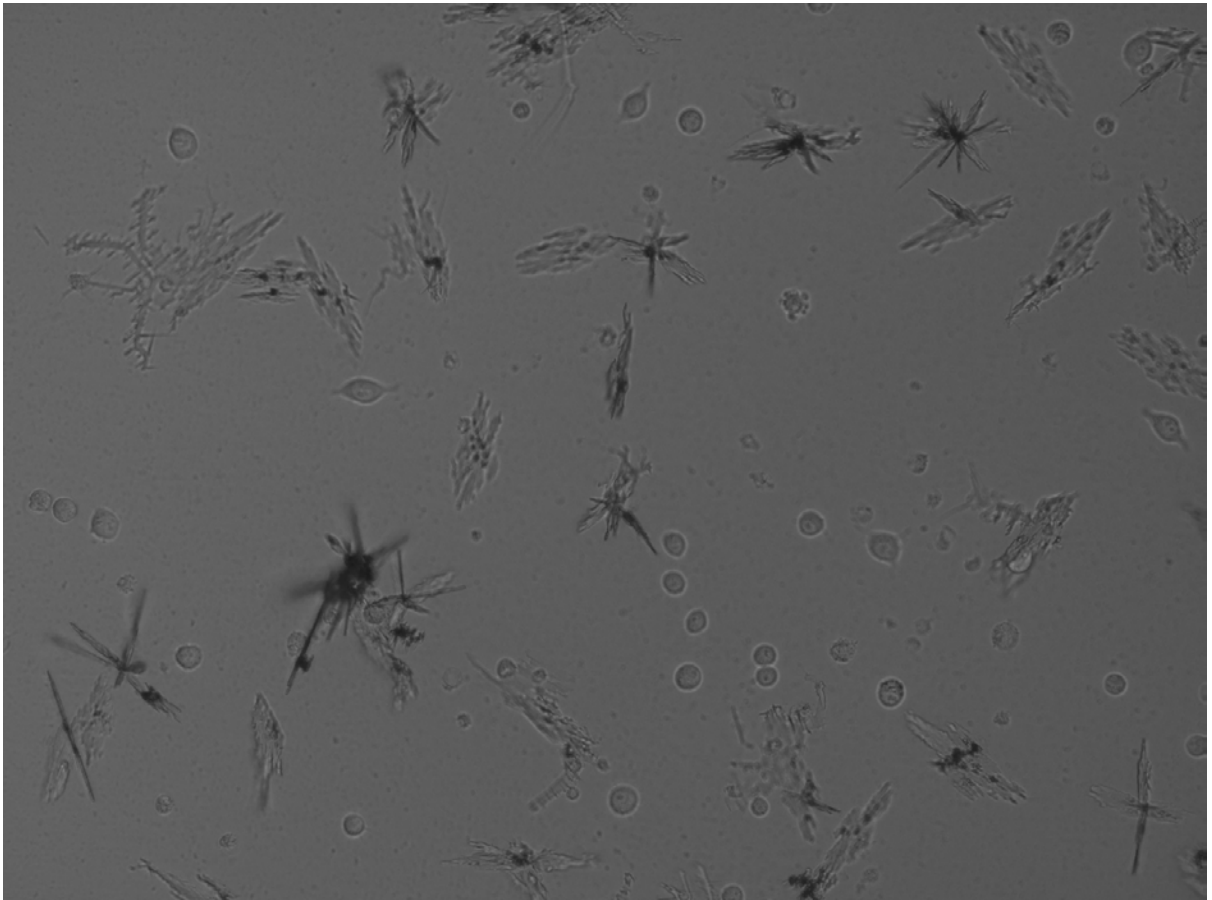

SH-SY5Y Control

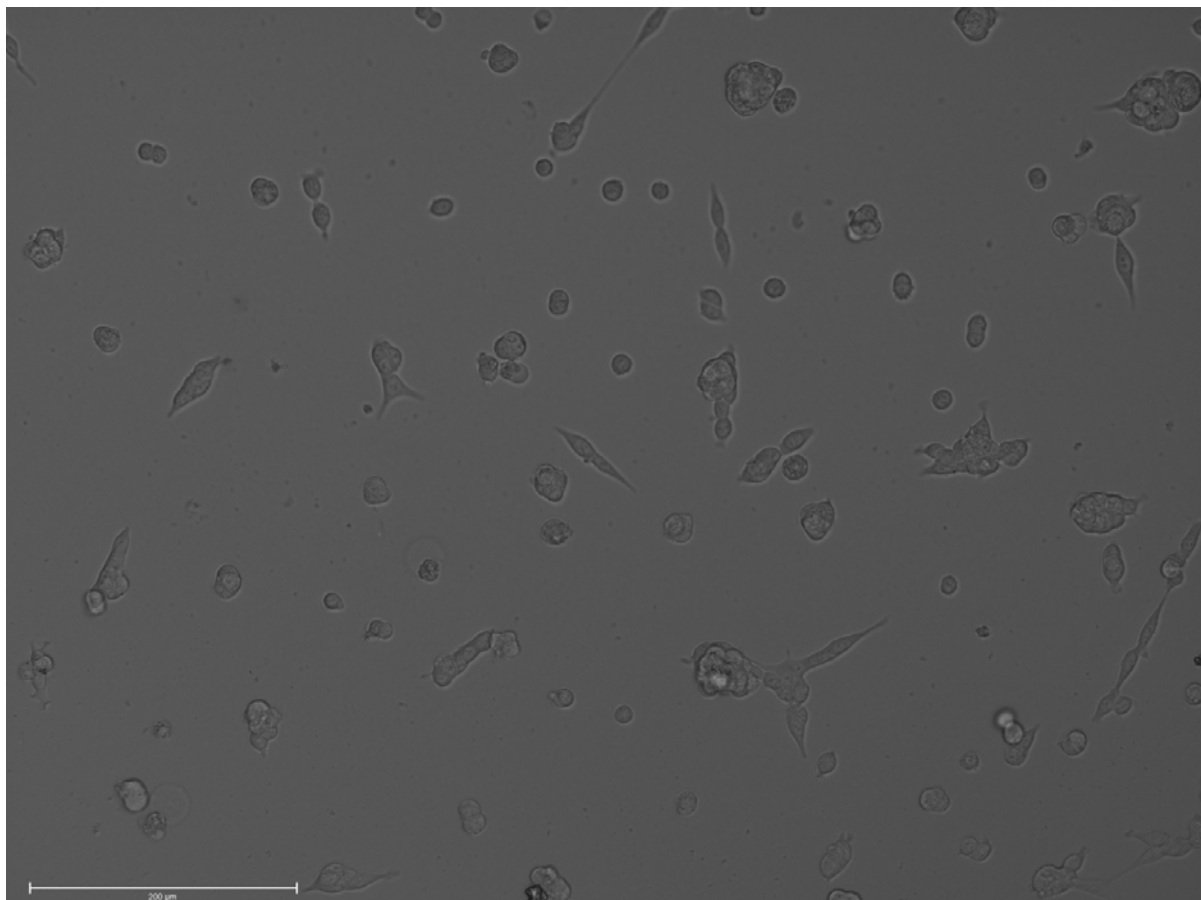

SH-SY5Y Control

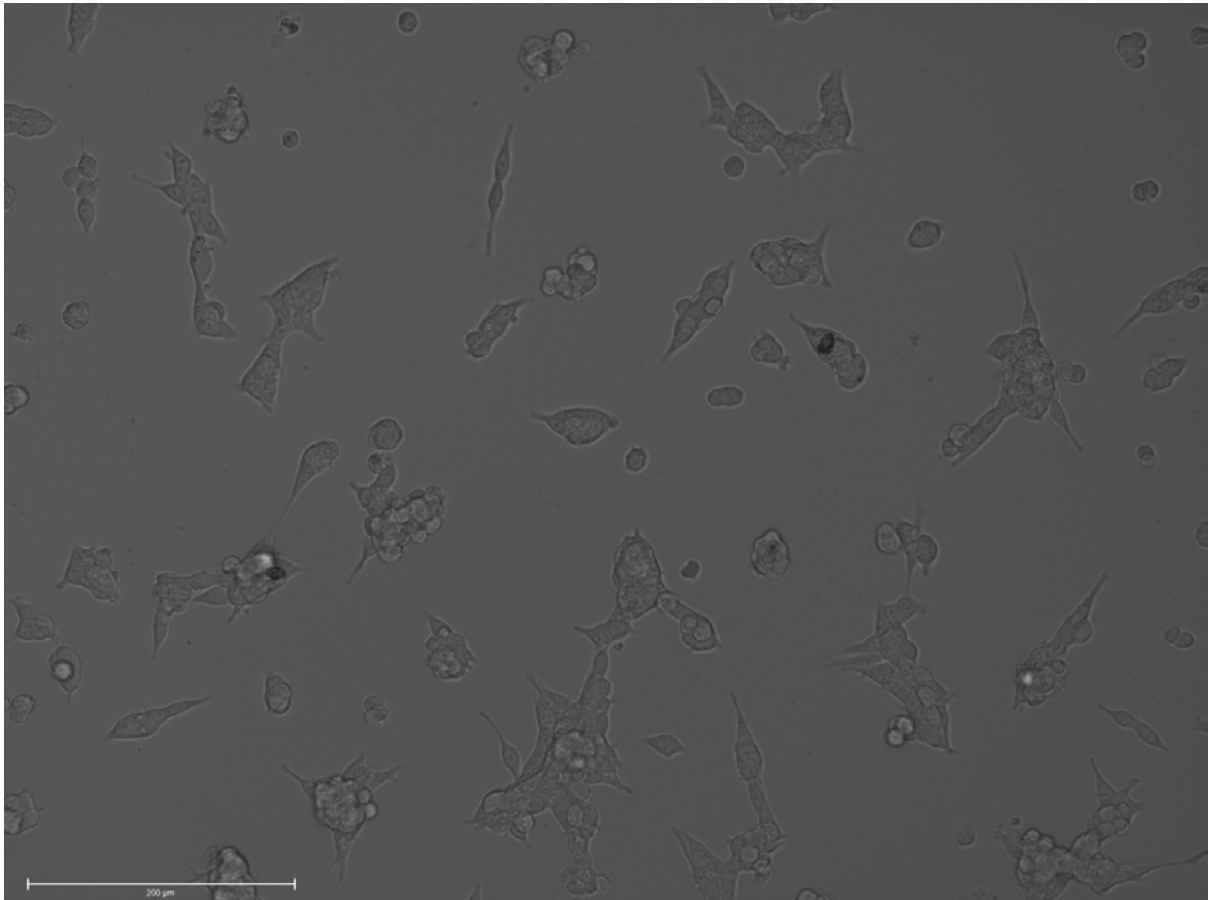

SH-SY5Y + 100 $\mu$ M FPRa14

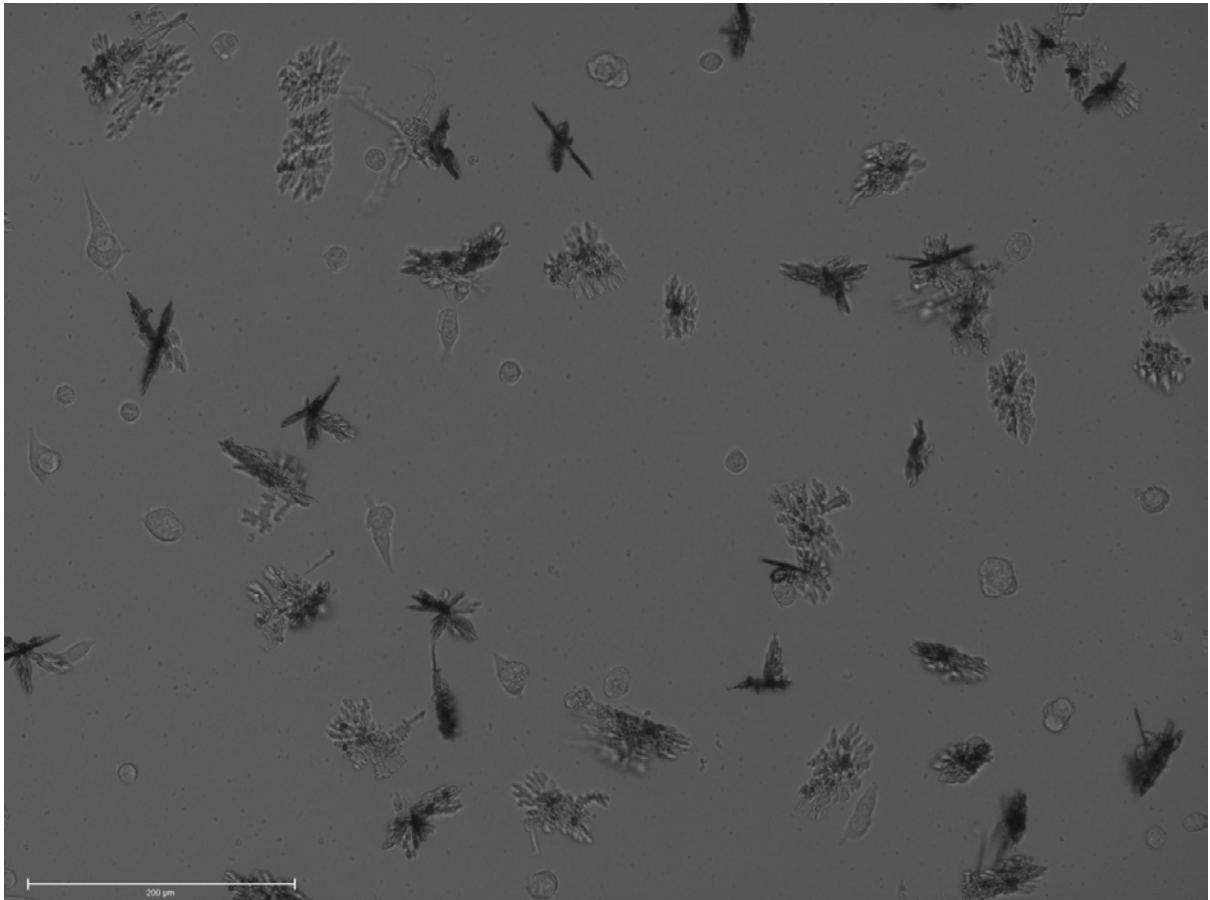

SH-SY5Y + 100 $\mu$ M FPRa14

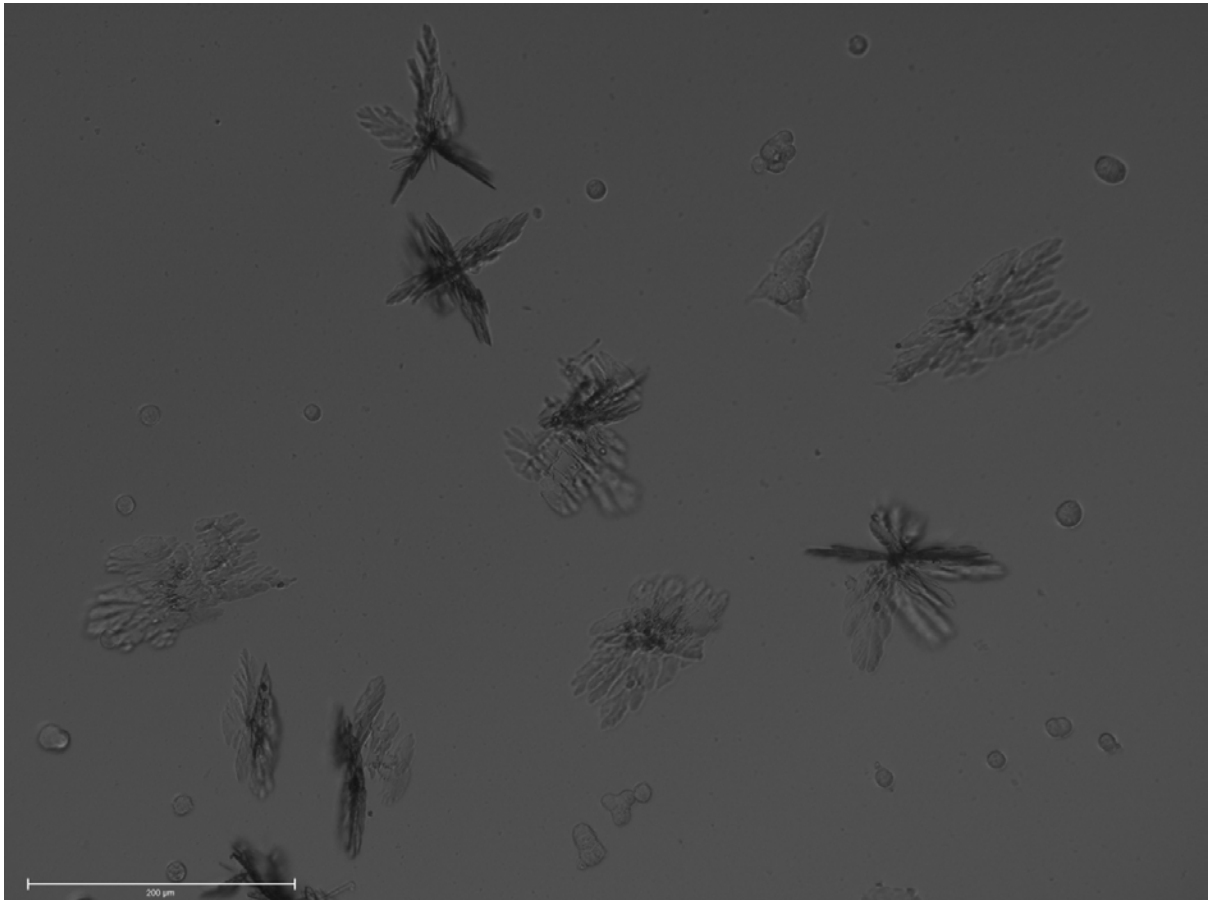

SH-SY5Y + 100 $\mu$ M FPRa14

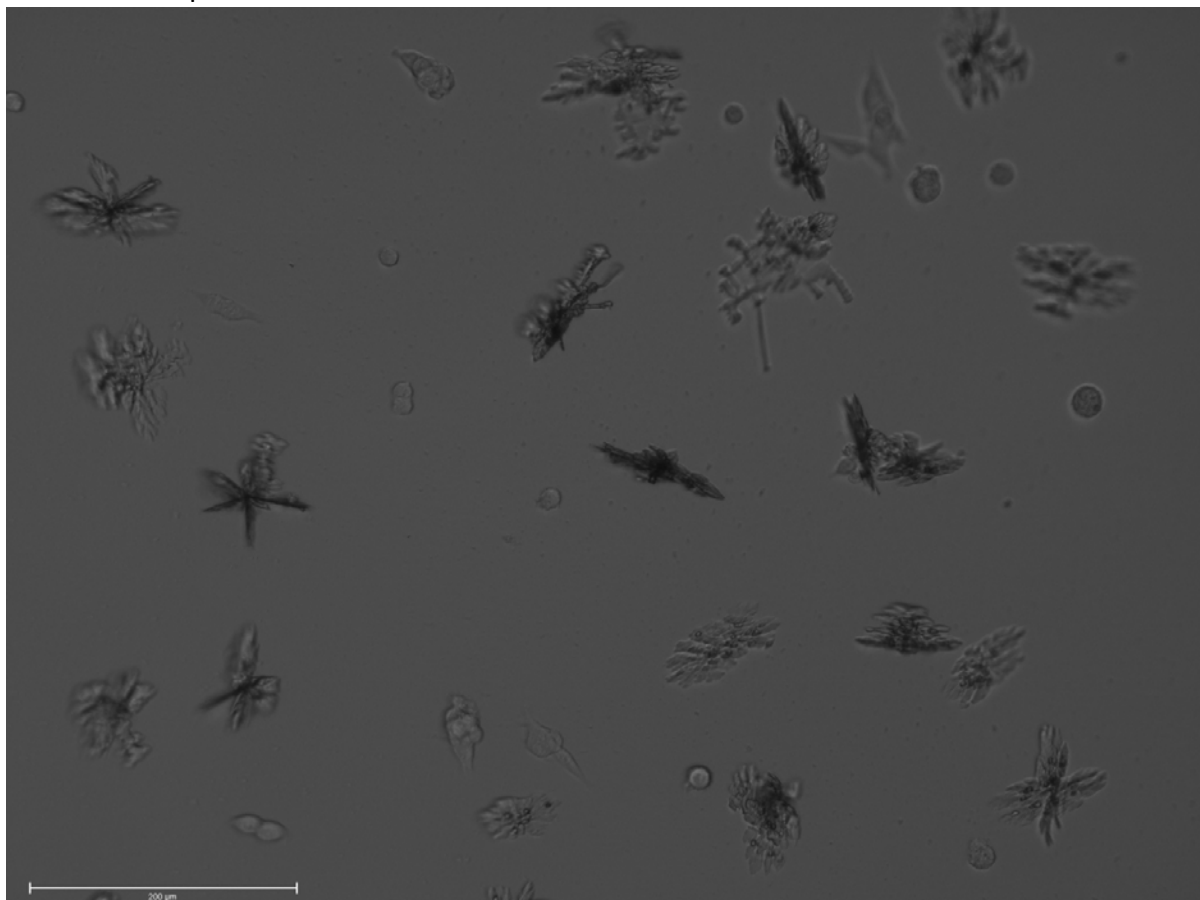

SH-SY5Y + 100 $\mu$ M FPRa14

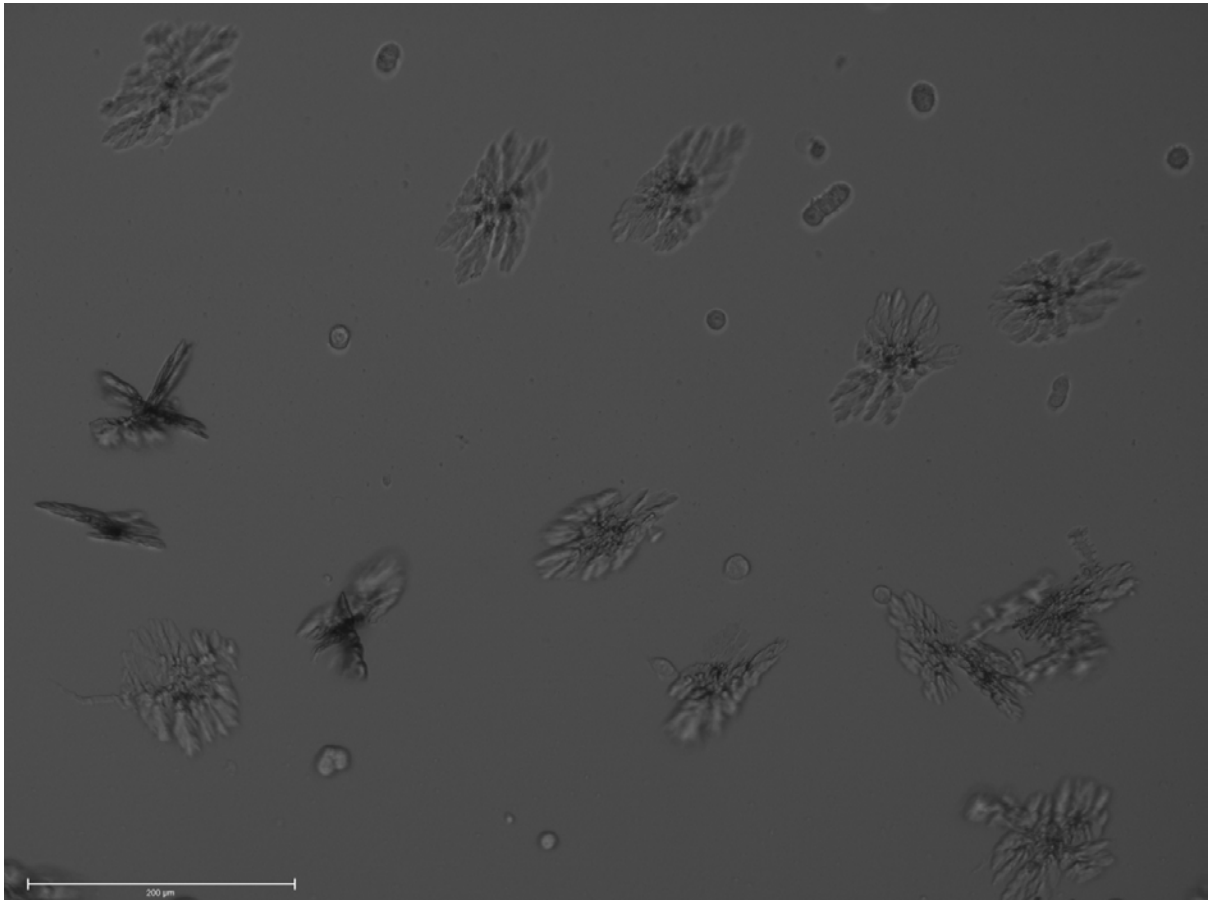

Supplement: pone.0217815.s001.pdf [file pone.0217815.s001.pdf]
